# Supplementary material
Source: Research Square preprint supplement (doi:10.21203/rs.3.rs-9238429/v1)

Appendix 1: Organisational Structural Orientation of the Comparative Framework

b *Sources:* The literature ([Malik, 2018](#_ENREF_19))

Appendix 2: Patent Vocabulary Ratio in Exploratory and Exploitative Tech. Orientation
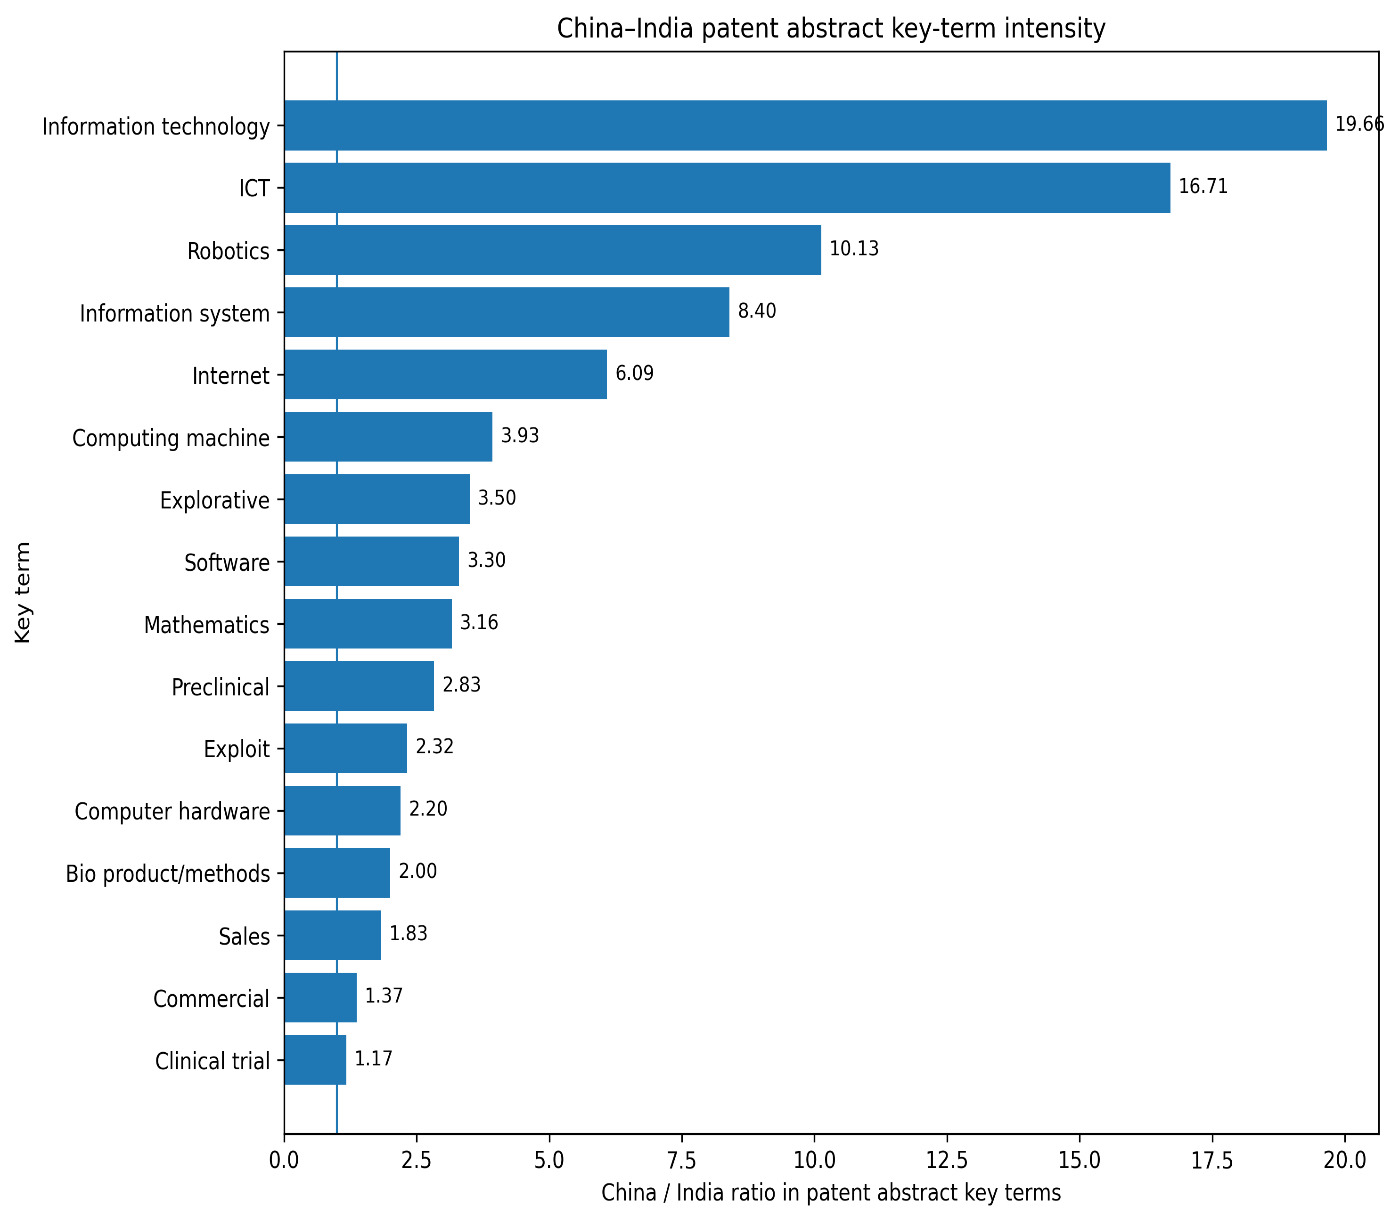


Appendix 3: China–India Ratios in OECD and International Partnership Structure
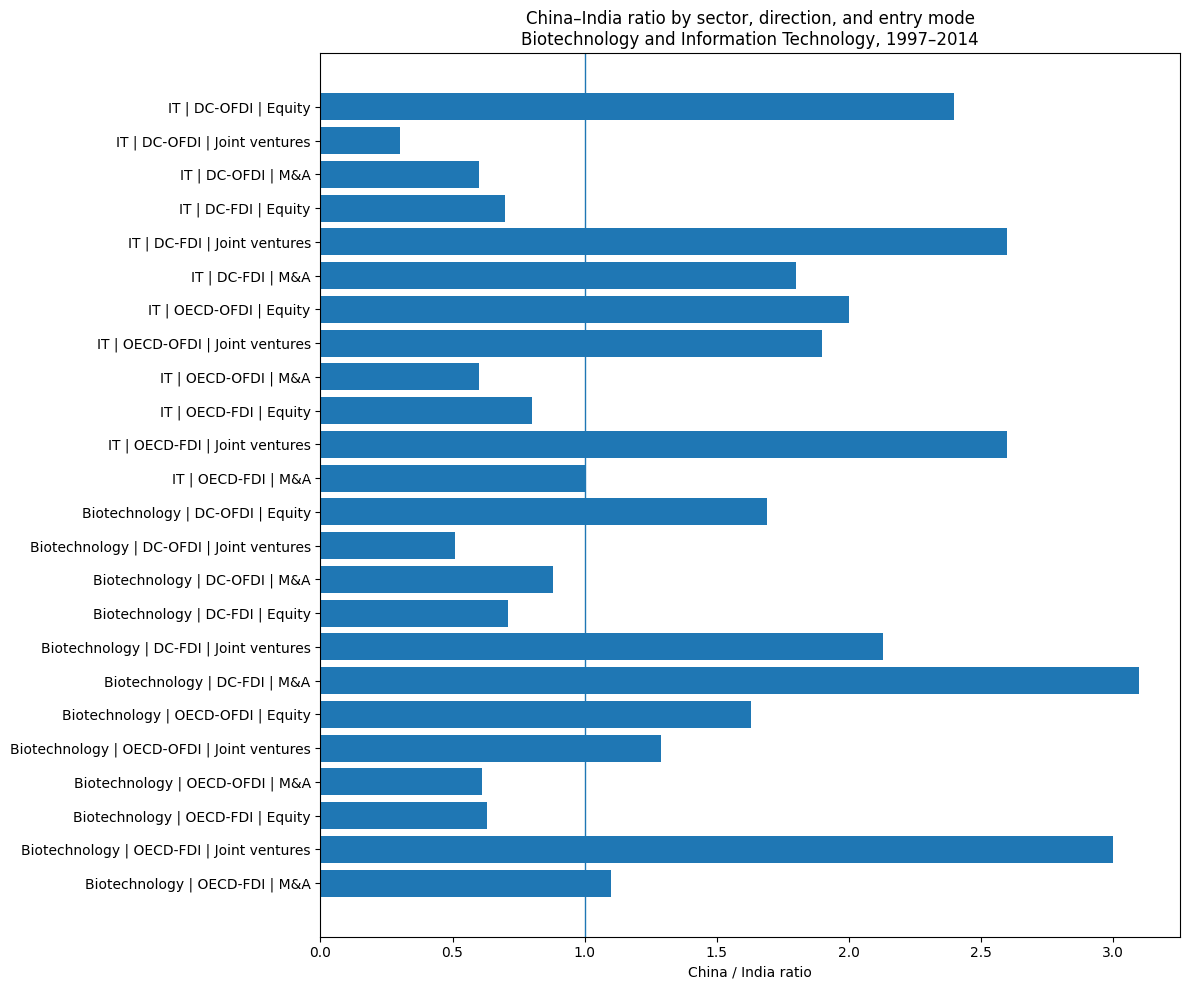

Supplement: Supplementary file 1 [file 989c68584829f85fac0099f3.docx]
